# Supplementary material for: A theoretical study on the mechanism of conversion of C3H8 and CO2 to C3H6 and HCOOH by M4–B24N28 catalysis
Source: Royal Society of Chemistry journal article supplement (doi:10.1039/d2nj00522k), 2022-01-01
Supplement: d2nj00522k1.pdf [file d2nj00522k1.pdf]

# Supporting Information

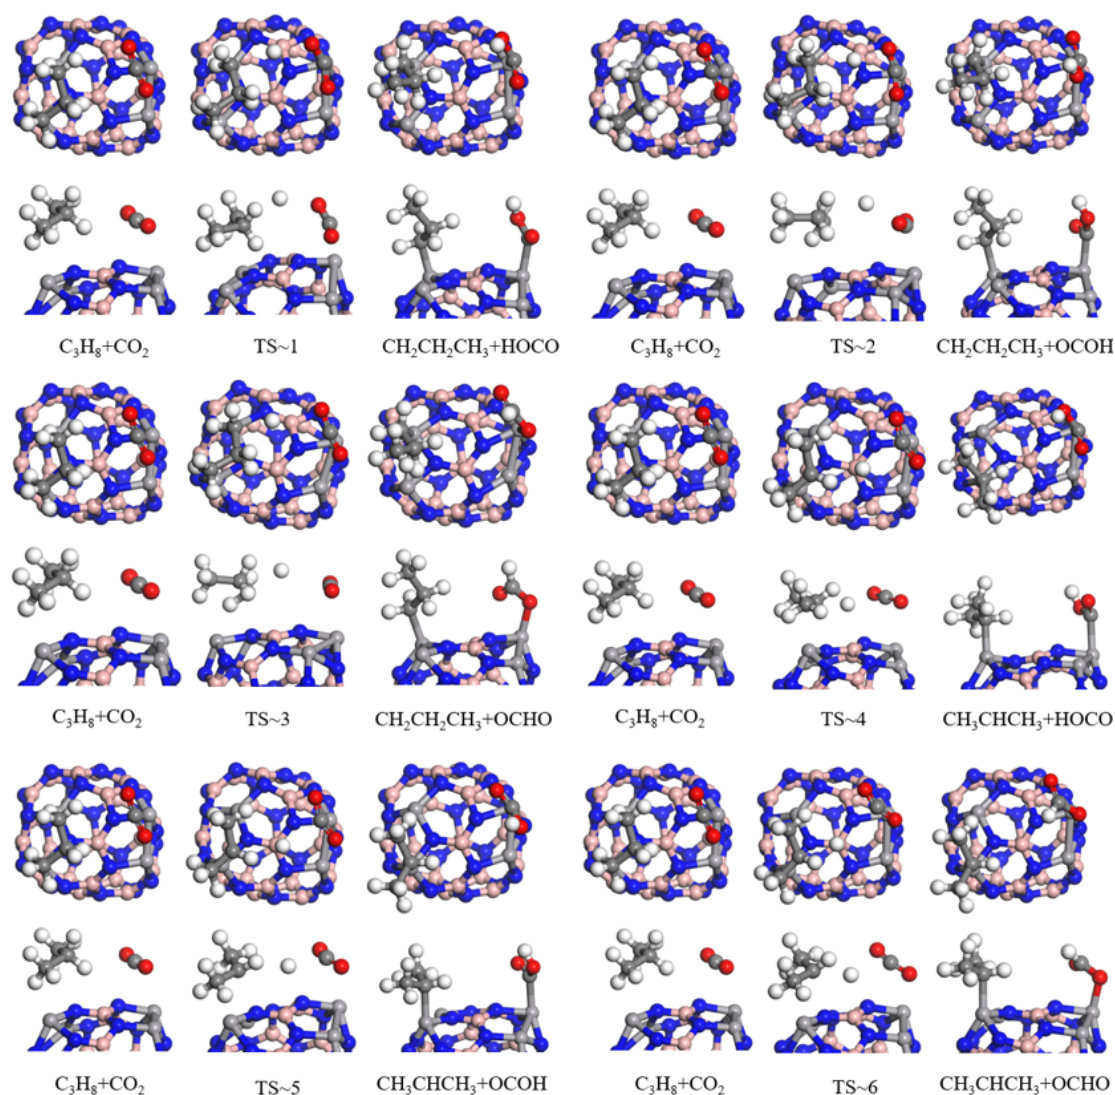

Figure S1. The most stable configuration of initial state (IS), transition state (TS) and final state (FS) in the initial oxidation reaction of  $C_3H_8$  on the  $V_4-B_{24}N_{28}$  surface are shown. Pink, blue, gray, red, and white respectively represent boron atoms, nitrogen atoms, carbon atoms, oxygen atoms, and hydrogen atoms, V atoms doped on the surface of the BN cage.

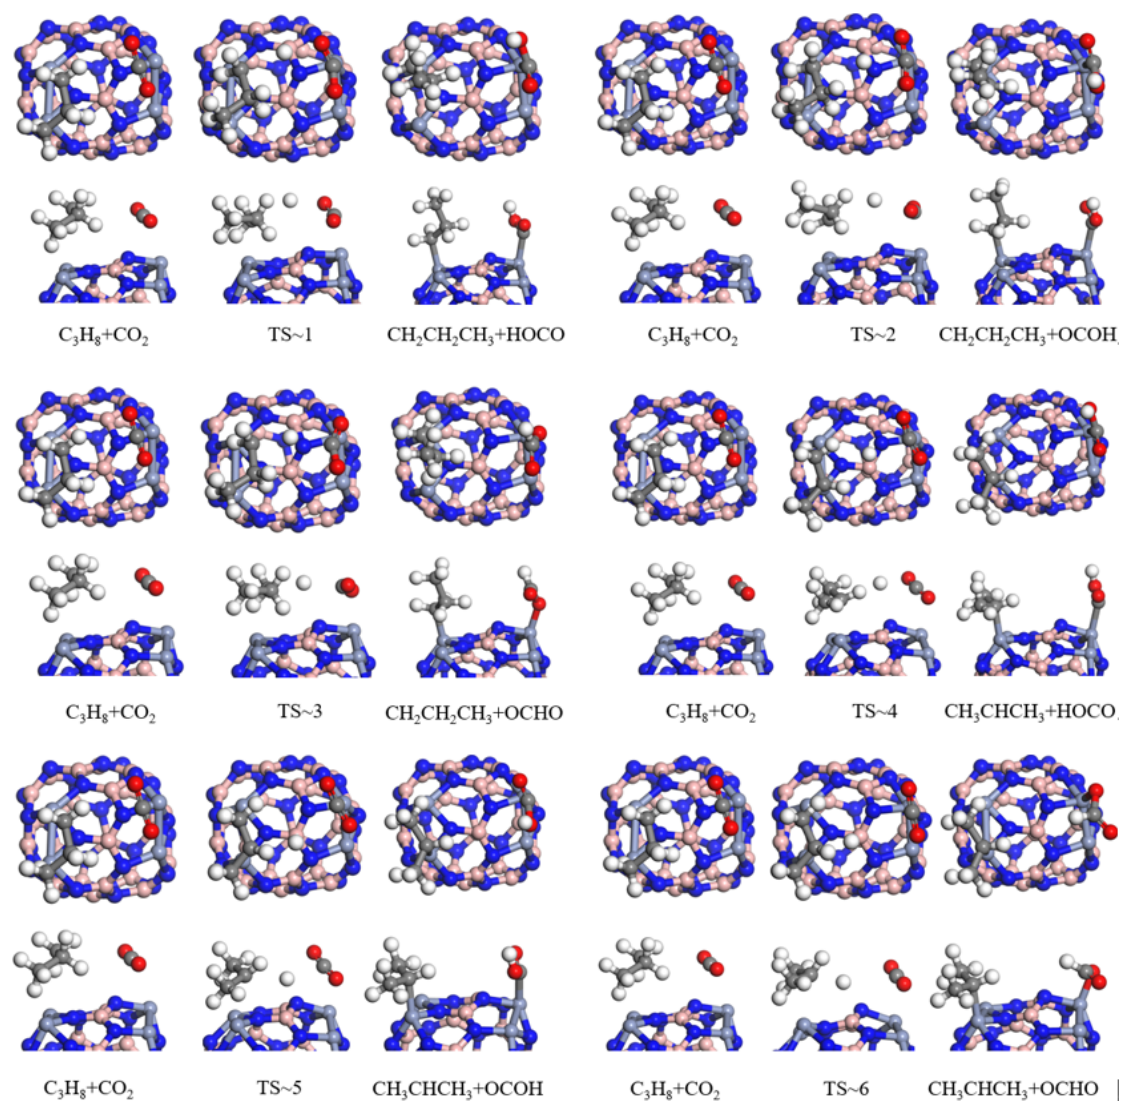

Figure S2. The most stable configuration of initial state (IS), transition state (TS) and final state (FS) in the initial oxidation reaction of  $C_3H_8$  on the  $Cr_4-B_{24}N_{28}$  surface are shown. Pink, blue, gray, red, and white respectively represent boron atoms, nitrogen atoms, carbon atoms, oxygen atoms, and hydrogen atoms, Cr atoms doped on the surface of the BN cage.

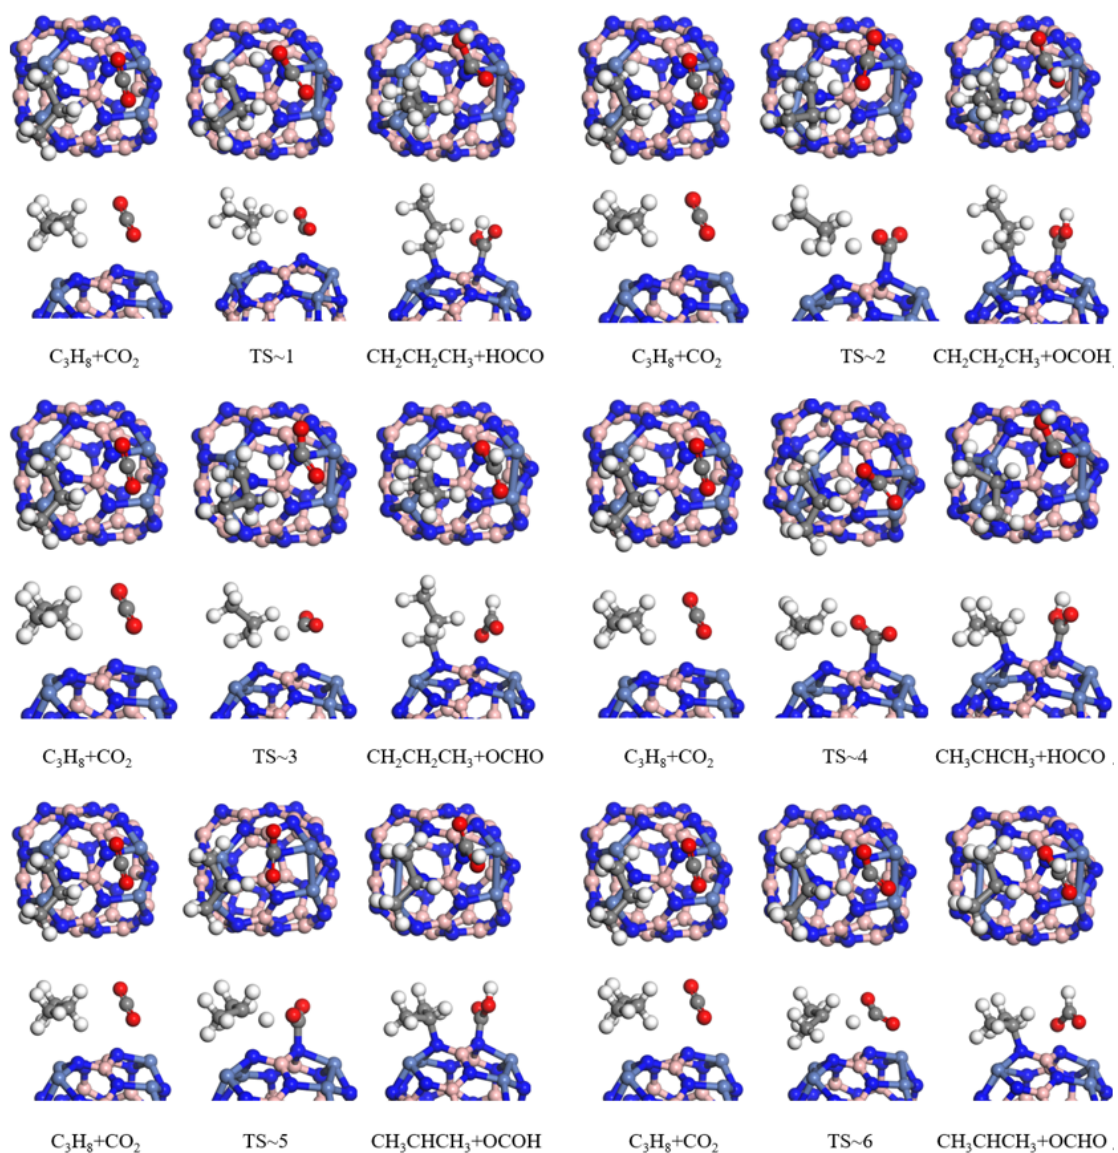

Figure S3. The most stable configuration of initial state (IS), transition state (TS) and final state (FS) in the initial oxidation reaction of  $C_3H_8$  on the  $Ni_4-B_{24}N_{28}$  surface are shown. Pink, blue, gray, red, and white respectively represent boron atoms, nitrogen atoms, carbon atoms, oxygen atoms, and hydrogen atoms, Ni atoms doped on the surface of the BN cage.



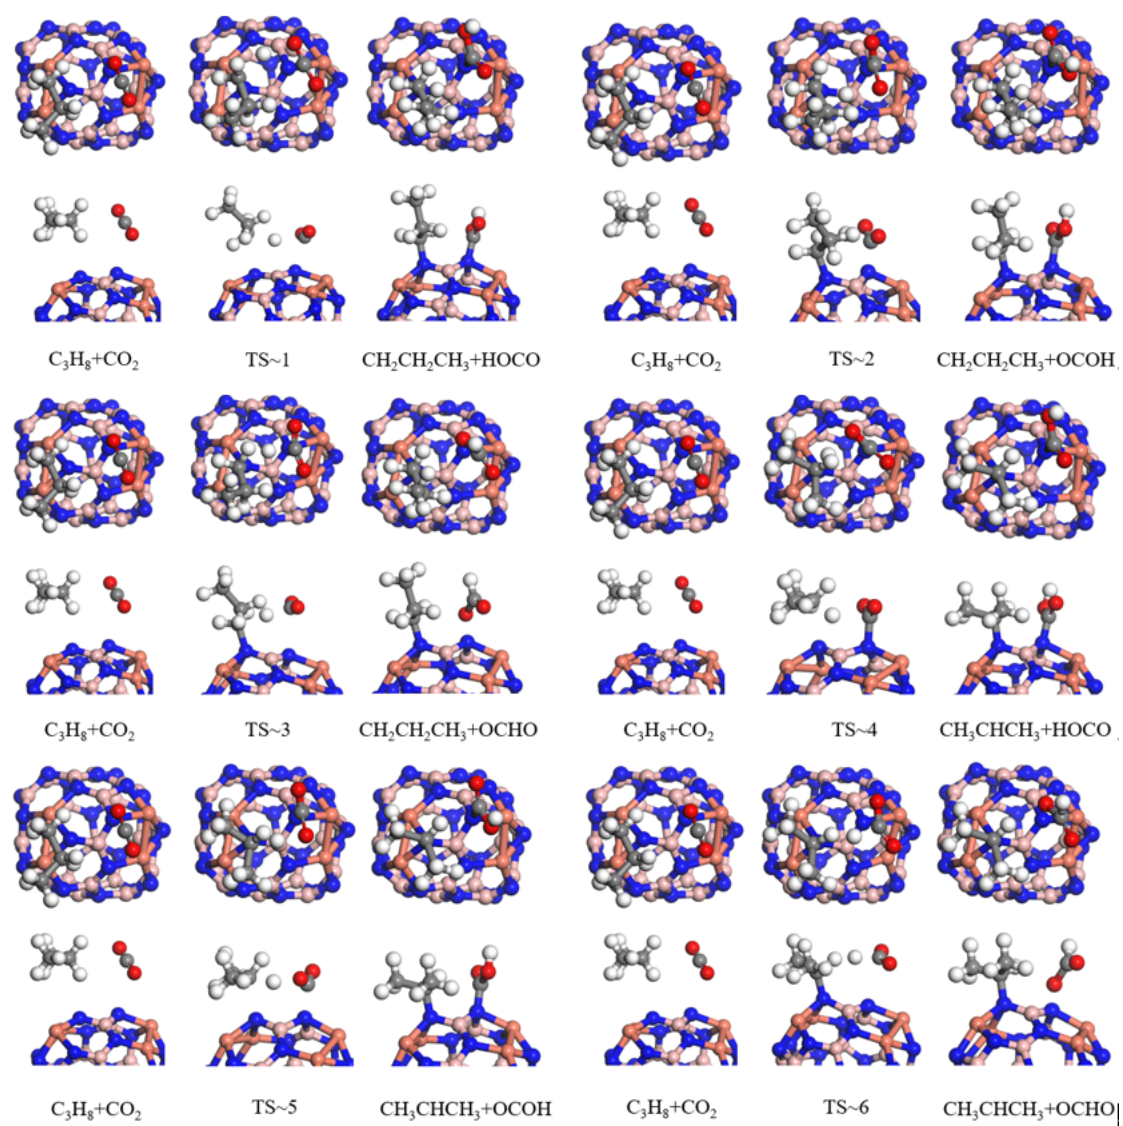

Figure S4. The most stable configuration of initial state (IS), transition state (TS) and final state (FS) in the initial oxidation reaction of  $C_3H_8$  on the  $Cu_4-B_{24}N_{28}$  surface are shown. Pink, blue, gray, red, and white respectively represent boron atoms, nitrogen atoms, carbon atoms, oxygen atoms, and hydrogen atoms, Cu atoms doped on the surface of the BN cage.

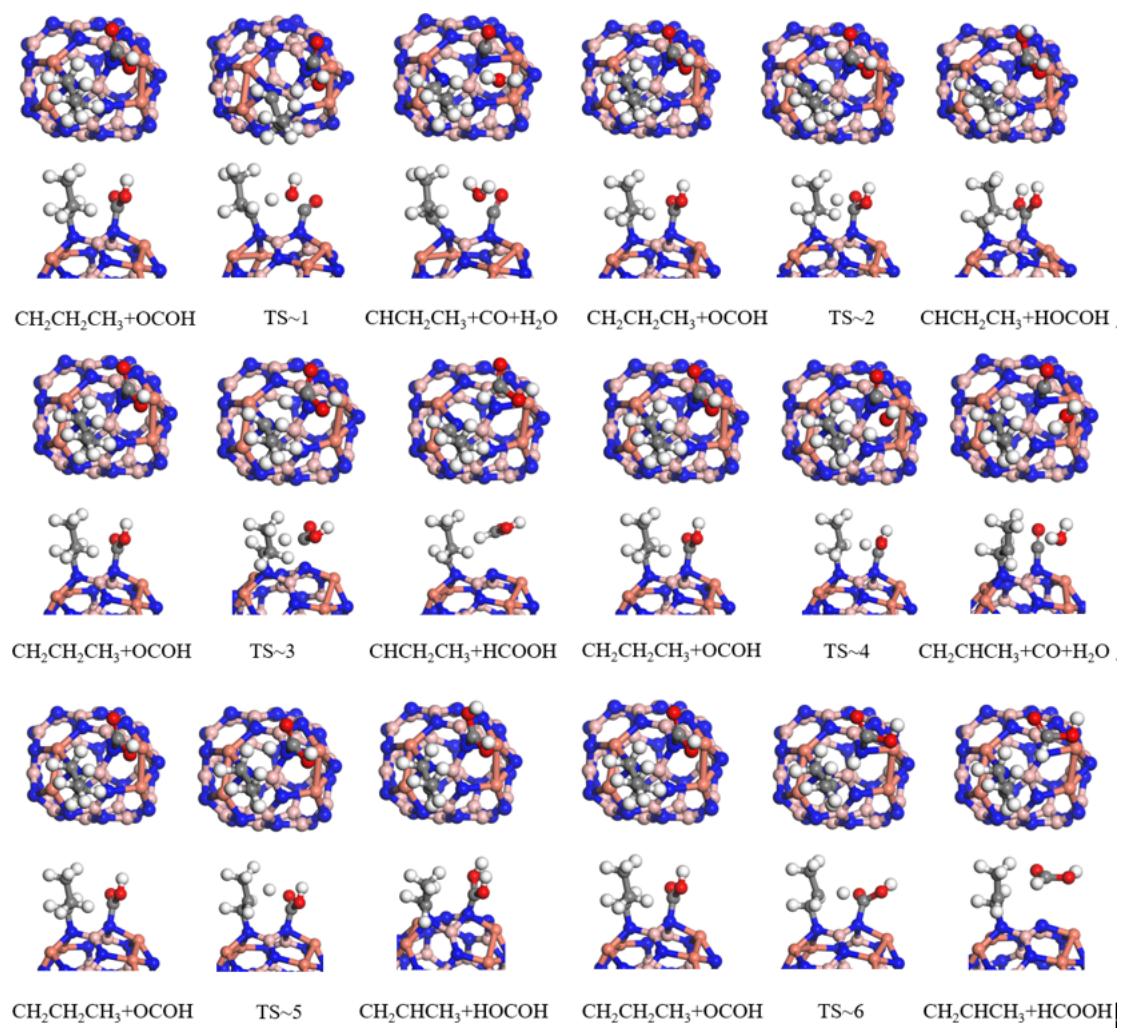

Figure S5. The most stable configuration of initial state (IS), transition state (TS) and final state (FS) in the oxidation reaction of propane by carbon dioxide to propylene and formic acid in the primary carbon dehydrogenation-O(2)-H path on the surface of  $\text{Cu}_4\text{-B}_{24}\text{N}_{28}$ .

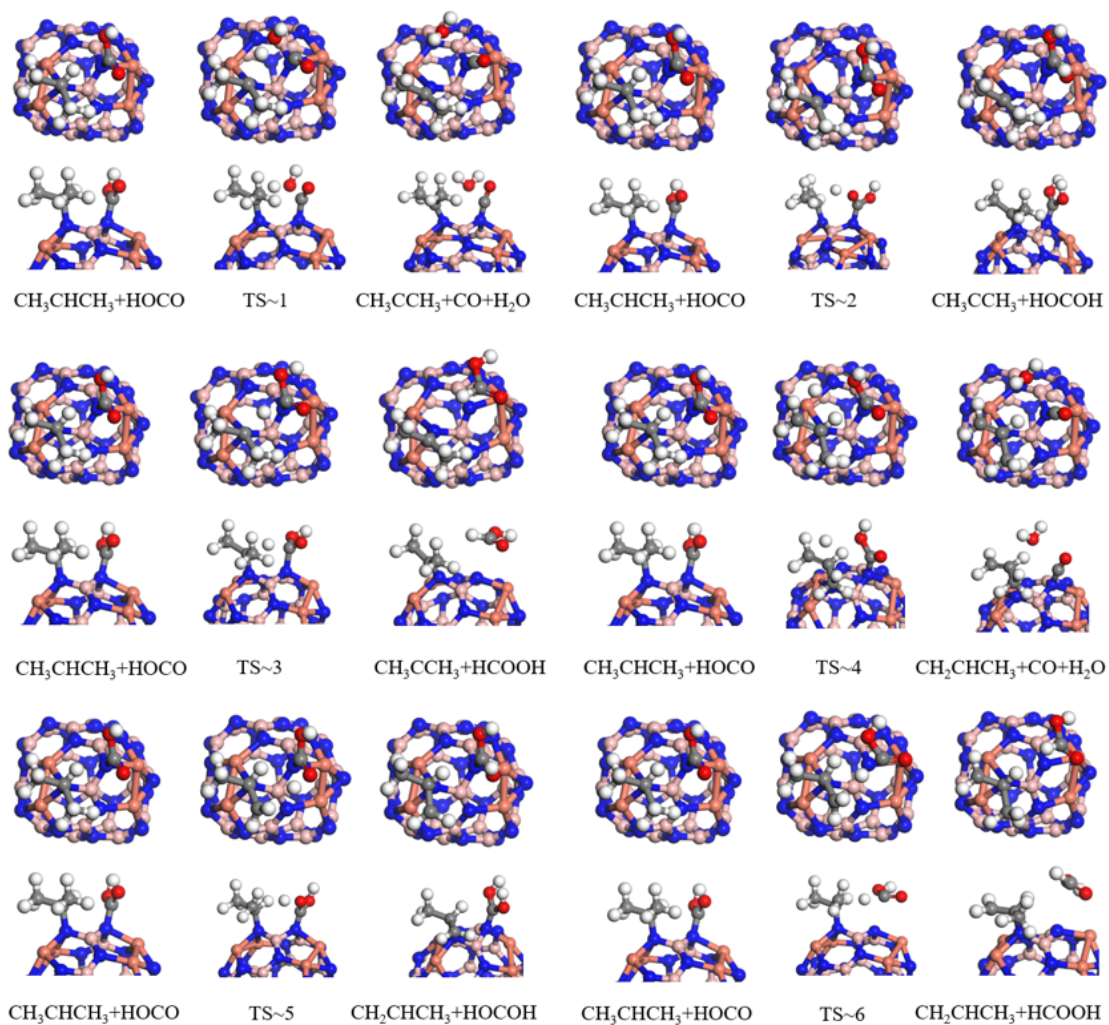

Figure S6. The most stable configuration of initial state (IS), transition state (TS) and final state (FS) in the oxidation reaction of propane by carbon dioxide to propylene and formic acid in the secondary carbon dehydrogenation-O(1)-H path on the surface of Cu<sub>4</sub>-B<sub>24</sub>N<sub>28</sub>.

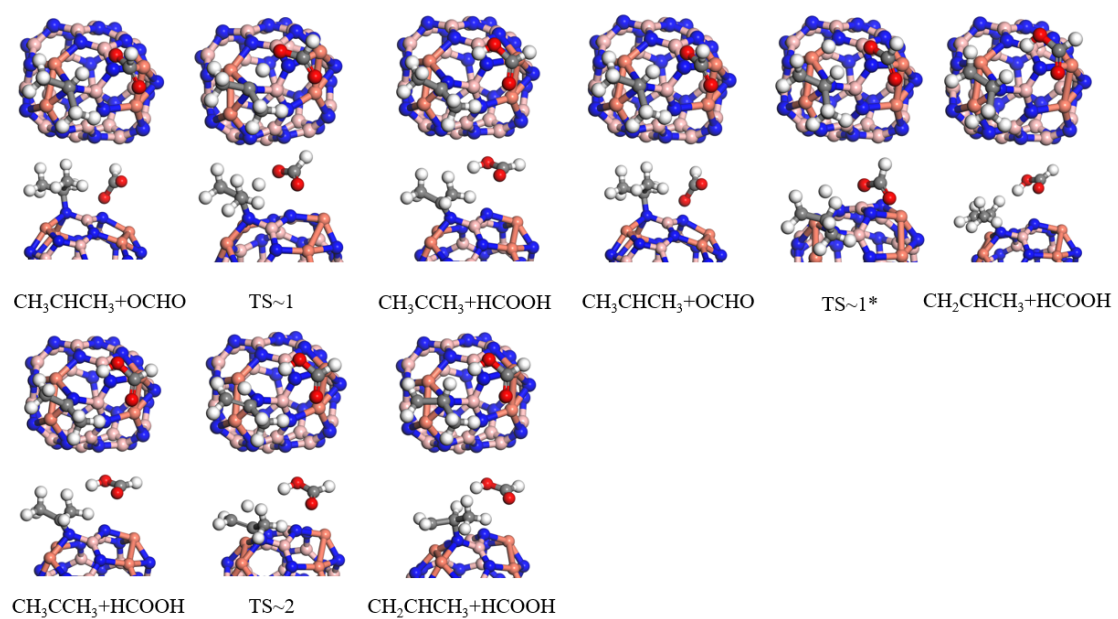

Figure S7. The most stable configuration of initial state (IS), transition state (TS) and final state (FS) in the oxidation reaction of propane by carbon dioxide to propylene and formic acid in the secondary carbon dehydrogenation-C-H path on the surface of Cu<sub>4</sub>-B<sub>24</sub>N<sub>28</sub>.
